# Supplementary material for: Bone marrow mesenchymal stromal cells induce nitric oxide synthase-dependent differentiation of CD11b+ cells that expedite hematopoietic recovery
Source: PubMed Central journal article supplement — Haematologica. 2017 May;102(5):818–25. doi: 10.3324/haematol.2016.155390 (PMC5477600; doi:10.3324/haematol.2016.155390), 2017-05
Supplement: 2016_155390-Disclosures_and_Contributions.pdf [file 2016_155390-Disclosures_and_Contributions.pdf]

Haematologica  
HAEMATOL/2016/155390  
Version 3

Bone marrow mesenchymal stromal cells induce nitric oxide synthase-dependent differentiation of CD11b+ cells that expedite hematopoietic recovery

Cristina Trento, Ilaria Marigo, Alice Pievani, Antonio Galleu, Luigi Dolcetti, Chun-Yin Wang, Marta Serafini, Vincenzo Bronte, and Francesco Dazzi

Disclosures: None

Contributions: CT performed research, data analysis and wrote the manuscript; IM, AP, AG, LD and CYW performed research; MS and VB contributed to data analysis; FD supervised the study and wrote the manuscript.
